# Supplementary material for: Human Colorectal Cancer from the Perspective of Mouse Models
Source: MDPI journal article supplement (doi:10.3390/genes10100788), 2019-10-11
Supplement: s1 [file s1]

**Table S1: Chemically induced tumorigenesis in mice**

| <i>Chemical compound</i>                         | <i>Abbreviation</i> | <i>Dosage</i>                           | <i>Administration</i>    | <i>Time</i> | <i>Tumor localization in the gut</i> | <i>Localization of extraintestinal tumors (if present)</i>         | <i>Background strain</i>                        | <i>Reference</i> |
|--------------------------------------------------|---------------------|-----------------------------------------|--------------------------|-------------|--------------------------------------|--------------------------------------------------------------------|-------------------------------------------------|------------------|
| 2-amino-1-methyl-6-phenylimidazol[4,5-b]pyridine | PhIP                | 300 p.p.m in high fat diet              | oral, continuous feeding | 40 weeks    | small intestine                      |                                                                    | C57BL/6N                                        | [30]             |
| N-methyl-N-nitroso-urea                          | MNU                 | 1.5 mg/mouse; 16 doses                  | intrarectal              | 31 weeks    | colon                                | uterine squamous cell carcinomas; mesenteric lymph node metastasis | house musk shrew (Jic: SUN)                     | [32]             |
| 1,2-dimethylhydrazine                            | DMH                 | 20 mg/kg                                | subcutaneous             | 20-45 weeks | colon                                |                                                                    | CF-1                                            | [34]             |
| azoxymethane                                     | AOM                 | 10 mg/kg; 1-6 doses                     | intraperitoneal          | 12-24 weeks | colon                                |                                                                    | AJ, SWR/J, Balb/CJ, CD-1, CBA/J, FVB/N, C57BL/6 | [43]             |
| azoxymethane/dextran sulfate sodium salt         | AOM/DSS             | 10 mg/kg of AOM and 5 days of 1-3 % DSS | intraperitoneal/oral     | 10 weeks    | colon                                |                                                                    | AJ, SWR/J, Balb/CJ, CD-1, CBA/J, FVB/N, C57BL/6 | [43]             |

**Table S2: Mouse models of hyperactivated Wnt signaling**

| Gene name     | Generated allele                   | Mutation type                                               | Outcome of mutation                                                           | Tumor localization in the gut       | Tumor count *                                | Localization of extraintestinal tumors (if present) | Background strain                           | Reference |
|---------------|------------------------------------|-------------------------------------------------------------|-------------------------------------------------------------------------------|-------------------------------------|----------------------------------------------|-----------------------------------------------------|---------------------------------------------|-----------|
| <i>Apc</i>    | <i>Apc<sup>Aex1-15</sup></i>       | floxed exon 1-15; <i>Meox-Cre</i>                           | null allele; embryonic recombination                                          | small intestine, occasionally colon | xxx                                          |                                                     | C57BL/6                                     | [107]     |
| <i>Apc</i>    | <i>Apc<sup>A242</sup></i>          | β-geo cassette inserted between exon 7 and 8                | truncated Apc protein 241 aa                                                  | small intestine                     | xxx                                          |                                                     | C57BL/6J                                    | [96]      |
| <i>Apc</i>    | <i>Apc<sup>A474</sup></i>          | NeoR cassette inserted in exon 9; duplication of exons 7-10 | truncated Apc protein 474 aa                                                  | small intestine                     | xxx                                          | mammary adenocanthoma                               | C57BL/6                                     | [97]      |
| <i>Apc</i>    | <i>Apc<sup>580D</sup></i>          | <i>Ad-Cre</i> injected into colorectum                      | truncated Apc protein 580 aa                                                  | colorectum                          | x                                            |                                                     | ND                                          | [99]      |
| <i>Apc</i>    | <i>Apc<sup>A580</sup></i>          | <i>Krt14-Cre</i>                                            | truncated Apc protein 580 aa in the epithelial cells                          | small intestine                     | xxx                                          | squamous metaplasia in various epithelial tissue    | C57BL/6J                                    | [100]     |
| <i>Apc</i>    | <i>Apc<sup>A14</sup></i>           | <i>MeuCre40</i>                                             | truncated Apc protein 580 aa; embryonic recombination                         | small intestine, colon              | xx; tubular adenomas and invasive carcinomas |                                                     | C57BL/6                                     | [102]     |
| <i>Apc</i>    | <i>Apc<sup>A15</sup></i>           | <i>Tg-Fabpl-Cre</i>                                         | truncated Apc protein 650 aa in the distal small intestine and colon          | small intestine, occasionally colon | xxx                                          | cutaneous follicular cysts, desmoid tumors          | C57BL/6                                     | [106]     |
| <i>Apc</i>    | <i>Apc<sup>A716</sup></i>          | NeoR cassette inserted in exon 15                           | truncated Apc protein 716 aa                                                  | small intestine                     | xxxx                                         |                                                     | C57BL/6J                                    | [98]      |
| <i>Apc</i>    | <i>Apc<sup>Min</sup></i>           | chemically-induced germinal mutation                        | truncated Apc protein 850 aa                                                  | small intestine, occasionally colon | xxx                                          | stomach, mammary gland                              | C57BL/6J                                    | [66]      |
| <i>Apc</i>    | <i>Apc<sup>Min-FCCC</sup></i>      | chemically-induced germinal mutation                        | truncated Apc protein 850 aa                                                  | small intestine, colon              | xxx; adenocarcinomas in colon                | stomach, mammary gland                              | C57BL/6J                                    | [72]      |
| <i>Apc</i>    | <i>Apc<sup>1309</sup></i>          |                                                             | truncated Apc protein 1309 aa                                                 | small intestine, occasionally colon | xx                                           | stomach                                             | C57BL/6J                                    | [83]      |
| <i>Apc</i>    | <i>Apc<sup>1322T</sup></i>         | NeoR cassette inserted in exon 15                           | truncated Apc protein 1322 aa                                                 | small intestine, occasionally colon | xxxx                                         |                                                     | C57BL/6J                                    | [81]      |
| <i>Apc</i>    | <i>Apc<sup>1572T</sup></i>         | NeoR cassette inserted in exon 15                           | truncated Apc protein 1572 aa                                                 |                                     | tumor free                                   | mammary adenocarcinomas                             | C57BL/6J                                    | [95]      |
| <i>Apc</i>    | <i>Apc<sup>1638N</sup></i>         | NeoR cassette inserted in exon 15 (antisense insertion)     | null allele                                                                   | small intestine                     | x                                            | cutaneous follicular cysts, desmoid tumors          | not clear C57BL/6 or mix                    | [87]      |
| <i>Apc</i>    | <i>Apc<sup>1638T</sup></i>         | HygR cassette inserted in exon 15 (sense insertion)         | truncated Apc protein 1638 aa                                                 |                                     | tumor free                                   |                                                     | used C57BL/6J and mixed 129/Ola and C57BL/6 | [88]      |
| <i>Apc</i>    | <i>Apc<sup>ASAMP</sup></i>         | floxed codons 1322-2006; <i>Pgk-Cre</i>                     | central portion of the Apc gene deleted, while the C-terminus remained intact | small intestine                     | xxx                                          |                                                     | C57BL/6J                                    | [86]      |
| <i>Ctnnb1</i> | <i>Catnb<sup>+/-lox(ex3)</sup></i> | floxed exon 3; <i>Krt1-19-Cre</i>                           | stabilized β-catenin in the epithelial cells                                  | small intestine, colon              | xxxx; microadenomas in colon                 |                                                     | C57BL/6N                                    | [110]     |
| <i>Ctnnb1</i> | <i>Catnb<sup>+/-lox(ex3)</sup></i> | floxed exon 3; <i>Tg-Fabpl-Cre</i>                          | stabilized β-catenin in the distal small intestine and colon                  | small intestine, colon              | xxxx                                         |                                                     | C57BL/6N                                    | [110]     |
| <i>Rspo3</i>  | <i>Rspo3<sup>inv</sup></i>         | <i>Lgr5-EGFP-IRES-CreERT2</i> + tamoxifen                   | conditional <i>Rspo3</i> expression from a synthetic CAGGS promoter           | small intestine, caecum, colon      | x                                            |                                                     | FVB                                         | [114]     |
| <i>Rspo3</i>  | <i>Ptprk(ex1)-Rspo3</i>            | inducible CRISPR/Cas9 + doxocycline                         | gene fusion Ptprk-Rspo3                                                       | small intestine                     | displasia and hyperplasia                    |                                                     | mixed 129 and C57BL/6                       | [115]     |
| <i>Rspo2</i>  | <i>Eif3e(ex1)-Rspo2</i>            | inducible CRISPR/Cas9 + doxocycline                         | gene fusion Eif3e-Rspo2                                                       | small intestine                     | hyperplasia with limited growth              |                                                     | mixed 129 and C57BL/6                       | [115]     |

<sup>a)</sup> x < 10; xx 10-50; xxx 50-200; xxxx > 200

**Table S3: Mouse models of the deregulated Hippo pathway**

| <i>Gene name</i>  | <i>Generated allele</i>                                 | <i>Mutation type</i>             | <i>Outcome of mutation</i>                                        | <i>Additional treatment</i>                                    | <i>Phenotype in the gut</i>                                                                         | <i>Phenotype in other tissues</i> | <i>Background strain</i> | <i>Reference</i> |
|-------------------|---------------------------------------------------------|----------------------------------|-------------------------------------------------------------------|----------------------------------------------------------------|-----------------------------------------------------------------------------------------------------|-----------------------------------|--------------------------|------------------|
| <i>Yap1</i>       | <i>Yap1</i> <sup>S127A</sup>                            | doxycycline-dependent allele     | conditionally stabilized Yap protein                              |                                                                | dysplasia and hyperplasia in the small intestine; (colon was not analyzed)                          | enlargement of multiple organs    | ND                       | [123]            |
| <i>Yap1</i>       | <i>Yap1</i> <sup>S127A</sup>                            | <i>Villin-rtTA</i> + doxycycline | conditionally stabilized Yap protein in the intestinal epithelium |                                                                | degeneration of the small intestinal epithelium; (colon was not analyzed)                           |                                   | ND                       | [124]            |
| <i>Yap1</i>       | <i>Yap</i> <sup>flax/flax</sup>                         | <i>Villin-Cre</i>                | loss of Yap protein in the intestinal epithelium                  | chemically induced colitis (DSS)                               | increased colitis-mediated damage of the colon epithelium                                           |                                   | ND                       | [126]            |
| <i>Sav1</i>       | <i>Sav1</i> <sup>flax/flax</sup>                        | <i>Villin-Cre</i>                | loss of Sav1 in the intestinal epithelium                         |                                                                | hyperplasia in the small intestine and colon                                                        |                                   | ND                       | [126]            |
| <i>Mst1; Mst2</i> | <i>Mst1</i> <sup>null</sup> / <i>Mst2</i> <sup>ff</sup> | <i>Villin-Cre</i>                | complete Mst1 loss and Mst2 loss in the intestinal epithelium     |                                                                | dysplasia in the small intestine and colon; reduced caecum and adenomas in the distal part of colon |                                   | mixed 129/Sv and C57BL/6 | [125]            |
| <i>Regγ</i>       | <i>Regγ</i> <sup>-/-</sup>                              | deletion of exons 5-9            | loss of Regγ protein                                              | chemically induced colitis-associated carcinogenesis (AOM/DSS) | smaller and less tumors than control animals                                                        |                                   | C57BL/6                  | [122]            |

**Table S4: Mouse models of the impaired p53 pathway**

| <i>Gene name</i>                    | <i>Generated allele</i>                                               | <i>Mutation type</i>                                                        | <i>Outcome of mutation</i>             | <i>Additional treatment</i>                                                                      | <i>Phenotype in the gut</i>                                                                                          | <i>Phenotype in other tissues</i>                                               | <i>Background strain</i> | <i>Reference</i> |
|-------------------------------------|-----------------------------------------------------------------------|-----------------------------------------------------------------------------|----------------------------------------|--------------------------------------------------------------------------------------------------|----------------------------------------------------------------------------------------------------------------------|---------------------------------------------------------------------------------|--------------------------|------------------|
| <i>Trp53</i>                        | <i>p53</i> <sup>-/-</sup>                                             | exons 2-6 replaced by NeoR cassette                                         | loss of p53 protein                    |                                                                                                  | rare intestinal tumors, mice viable up to 6 months                                                                   | lymphomas, osteosarcomas, adenocarcinomas etc.                                  | mixed 129SV and C57BL/6  | [138]            |
| <i>Trp53</i>                        | <i>p53</i> <sup>+/-515A</sup>                                         | loxP-PGK-NeoR cassette inserted in intron 4; <i>CMV-cre</i>                 | p53 truncation 515 aa                  |                                                                                                  |                                                                                                                      | lymphomas, osteosarcomas with high metastases rate                              | C57BL/6                  | [139]            |
| <i>Trp53</i>                        | <i>p53</i> <sup>+/-</sup> and <i>p53</i> <sup>+/-515A</sup>           |                                                                             | heterozygous loss or truncation of p53 | chemically induced colitis (DSS); chemically induced colitis-associated carcinogenesis (AOM/DSS) | more severe colitis and inflammation-induced carcinogenesis in colon of <i>p53</i> <sup>+/-515A</sup> mice           |                                                                                 | C57BL/6                  | [142]            |
| <i>Trp53</i>                        | <i>p53</i> <sup>-/-</sup>                                             | NeoR cassette inserted in exon 5                                            | loss of p53 protein                    |                                                                                                  | increased number and invasiveness of intestinal adenomas in <i>Apc</i> <sup>+/-Min</sup> mice                        |                                                                                 | C57BL/6                  | [140]            |
| <i>Trp53; Tcr<math>\beta</math></i> | <i>p53</i> <sup>-/-</sup> <i>Tcr<math>\beta</math></i> <sup>-/-</sup> |                                                                             | loss of p53 in IBD-predisposed mouse   |                                                                                                  | adenocarcinomas in caecum and dysplasia in colon                                                                     | tumors of thymus                                                                | C57BL/6JCL               | [141]            |
| <i>Lkb1</i>                         | <i>Lkb1</i> <sup>-/+</sup>                                            | exons 2-4 replaced by NeoR cassette                                         | heterozygous loss of Lkb1 protein      |                                                                                                  | hamartomatous polyps in stomach (100%) and small intestine (31%), mice viable up to 70 weeks                         | vascular abnormalities                                                          | ND                       | [148]            |
| <i>Lkb1; Trp53</i>                  | <i>Lkb1</i> <sup>-/+</sup> <i>p53</i> <sup>+/-</sup>                  | Lkb1: floxed exons 2-8; <i>CMV-cre</i><br>Trp53: exons 2-6 replaced by NeoR | heterozygous loss of Lkb1 and p53      |                                                                                                  | hamartomatous polyps in stomach and small intestine, mice viable for 10 months                                       | organomegaly in <i>Lkb1</i> <sup>+/-</sup> mice; osteosarcomas and other tumors | 129                      | [149]            |
| <i>Cdkn1a</i>                       | <i>p21</i> <sup>-/-</sup>                                             | exons 2-3 replaced by PGK-NeoR cassette                                     | loss of p21 protein                    | chemically induced carcinogenesis (AOM)                                                          | enhanced formation of aberrant crypt foci (ACF) through proximal to distal colon                                     |                                                                                 | ND                       | [153]            |
| <i>Cdkn1a</i>                       | <i>p21</i> <sup>-/-</sup>                                             | exons 2 replaced by PGK-NeoR cassette                                       | loss of p21 protein                    |                                                                                                  | altered cell maturation in the intestinal mucosa; increased tumor formation in <i>Apc</i> <sup>+/-1638</sup> animals |                                                                                 | ND                       | [155]            |

**Table S5: Mouse strains modeling aberrant EGF signaling**

| Gene name  | Generated allele                                          | Mutation type                                       | Outcome of mutation                            | Additional treatment                                           | Phenotype in the gut                                                                                                                                                            | Phenotype in other tissues (if present) | Background strain             | Reference |
|------------|-----------------------------------------------------------|-----------------------------------------------------|------------------------------------------------|----------------------------------------------------------------|---------------------------------------------------------------------------------------------------------------------------------------------------------------------------------|-----------------------------------------|-------------------------------|-----------|
| Egfr       | <i>Egfr</i> <sup>wa2/wa2</sup>                            | missense mutation in tyrosine kinase domain of Egfr | dramatic loss of Egfr kinase activity          | chemically induced colitis-associated carcinogenesis (AOM/DSS) | lower incidence of chemically-induced tumors in colon                                                                                                                           |                                         | mixed C57BL6/J and A/J        | [163]     |
| Egfr       | <i>Egfr</i> <sup>wa5/wa5</sup>                            | missense mutation in tyrosine kinase domain of Egfr | kinase-dead Egfr                               | chemically induced colitis-associated carcinogenesis (AOM/DSS) | enhanced hyperplasia and dysplasia in colon                                                                                                                                     |                                         | C57BL6                        | [164]     |
| Egfr, Il10 | <i>Egfr</i> <sup>wa5/wa5</sup> <i>Il10</i> <sup>-/-</sup> | missense mutation in tyrosine kinase domain of Egfr | kinase-dead Egfr in IBD-predisposed mouse      |                                                                | increased incidence and progression of tumors in colon                                                                                                                          |                                         | C57BL6                        | [164]     |
| Kras       | <i>Kras</i> <sup>LA1</sup> ( <i>Kras</i> <sup>LA2</sup> ) | insertion of mutant (G12D) exon 1 into Kras gene    | stochastic activation of oncogenic Kras (G12D) |                                                                | aberrant crypt foci (AFC) in colon without further progression to adenomas; duodenal adenocarcinomas in <i>Apc</i> <sup>+/-Min</sup> and <i>Trp53</i> <sup>-/-</sup> mice       | lung tumors                             | pure 129 and mixed C57BL6/129 | [159]     |
| Kras       | <i>Kras</i> <sup>G12V</sup> <i>IREStggeo</i>              | <i>CMV-Cre</i> ; <i>RERTn-CreERT2</i> + tamoxifen   | activation of oncogenic Kras (G12V)            |                                                                | none                                                                                                                                                                            | lung tumors                             | mixed C57BL6/J and 129        | [170]     |
| Kras       | <i>LSL-K-ras</i> <sup>G12D</sup>                          | <i>Fabp-Cre</i>                                     | activation of oncogenic Kras (G12D)            |                                                                | hyperproliferation of colonic crypts                                                                                                                                            |                                         | mixed C57BL6 and 129SV        | [158]     |
| Kras       | <i>LSL-Kras</i> <sup>G12D</sup>                           | <i>Fabp-Cre</i>                                     | activation of oncogenic Kras (G12D)            |                                                                | hyperproliferation of colonic crypts; progression of colon adenomas in <i>Apc</i> <sup>2lox14/+</sup> mice                                                                      |                                         | ND                            | [169]     |
| Nras       | <i>LSL-Nras</i> <sup>G12D</sup>                           | <i>Fabp-Cre</i>                                     | activation of oncogenic Nras (G12D)            | chemically induced colitis (DSS)                               | reduced colitis-associated apoptosis                                                                                                                                            |                                         | C57BL6                        | [169]     |
| Kras       | <i>K-ras</i> <sup>Asp12</sup>                             | <i>Ah-Cre</i>                                       | activation of oncogenic Kras (Asp12)           | $\beta$ -naphthoflavone treatment                              | adenomas in the small intestine and colon within two years; increased number of adenomas in <i>Apc</i> <sup>+/-Min</sup> in the small intestine and with higher effect in colon |                                         | FVB/N                         | [172]     |
| Kras       | <i>LSL-K-ras</i> <sup>G12D</sup>                          | <i>Ad-Cre</i> injected into colorectum              | activation of oncogenic Kras (G12D)            |                                                                | progression and metastases of <i>Apc</i> <sup>cKO/cKO</sup> colon adenocarcinomas                                                                                               |                                         | ND                            | [173]     |
| Kras       | <i>Kras</i> <sup>A146T</sup>                              | <i>Rapbp1-Cre</i>                                   | activation of oncogenic Kras (A146T)           |                                                                | hyperproliferation of colonic crypts milder than in <i>K-ras</i> <sup>G12D</sup> ; progression of colon adenomas in <i>Apc</i> <sup>+2lox14</sup> mice                          |                                         | C57BL6                        | [174]     |
| Braf       | <i>Braf</i> <sup>V600E</sup>                              | <i>Villin-Cre</i>                                   | activation of oncogenic Braf (V600E)           |                                                                | hyperproliferation of colonic crypts, higher incidence of tumors                                                                                                                |                                         | ND                            | [180]     |
| Muc2       | <i>Muc2</i> <sup>-/-</sup>                                | exons 2-4 replaced by PGK-Neo cassette              | homozygous loss of Muc2 protein                |                                                                | adenocarcinomas in small intestine and colon, more than 1.5 tumor per mice after 12 months                                                                                      |                                         | mixed C57BL6J and 129OLA      | [186]     |

**Table S6: Mouse models of impaired TGFβ signaling**

| <i>Gene name</i> | <i>Generated allele</i>                                | <i>Mutation type</i>                             | <i>Outcome of mutation</i>                             | <i>Additional treatment</i>      | <i>Tumor localization in the gut</i> | <i>Tumor incidence</i>                                                                                                                   | <i>Localization of extraintestinal tumors (if present)</i> | <i>Background strain</i> | <i>Reference</i> |
|------------------|--------------------------------------------------------|--------------------------------------------------|--------------------------------------------------------|----------------------------------|--------------------------------------|------------------------------------------------------------------------------------------------------------------------------------------|------------------------------------------------------------|--------------------------|------------------|
| Tgfb1            | <i>Tgfb1</i> <sup>-/-</sup> <i>Rag2</i> <sup>-/-</sup> | exon 6 replaced by NeoR cassette                 | loss of Tgfb1 in immunodeficient mice                  |                                  | caecum, colon                        | colon carcinomas within 5 months                                                                                                         |                                                            | mixed 129S6 and CF-1     | [208]            |
| Tgfb2            | <i>Tgfb2</i> <sup>E2flax/E2flax</sup>                  | floxed exon 2; <i>Villin-CreERT2</i> + tamoxifen | conditional loss of Tgfb2 in the intestinal epithelium | chemically induced colitis (DSS) | colon                                | invasive colon carcinomas in 3-8 months                                                                                                  |                                                            | C57BL/6                  | [218]            |
| Smad3            | <i>Smad3</i> <sup>-/-</sup>                            | exon 2 replaced by IRES-LacZ-Neo cassette        | loss of Smad3                                          |                                  | colorectum                           | invasive tumors in 4-6 months                                                                                                            | metastases in lymph nodes                                  | 129/SV                   | [210]            |
| Smad4            | <i>Smad4</i> <sup>+/-</sup>                            | exon 1 replaced by NeoR cassette                 | partial loss of Smad4                                  |                                  | stomach, small intestine             | hamartomatous polyps in 1-2 years; more invasive tumors with extensive stromal cell proliferation in <i>Apc</i> <sup>+/-A7106</sup> mice |                                                            | C57BL/6N                 | [209, 216]       |

**Table S7: Mouse models of DNA mismatch repair deficiency**

| Gene name         | Generated allele                                      | Mutation type                                                                                | Outcome of mutation                                   | Tumor localization in the gut           | Tumor incidence and life span                                                                                                             | Localization of extraintestinal tumors (if present)                                                                       | Background strain              | Reference  |
|-------------------|-------------------------------------------------------|----------------------------------------------------------------------------------------------|-------------------------------------------------------|-----------------------------------------|-------------------------------------------------------------------------------------------------------------------------------------------|---------------------------------------------------------------------------------------------------------------------------|--------------------------------|------------|
| <i>Mlh1</i>       | <i>Mlh1</i> <sup>-/-</sup>                            | exon 2 replaced by NeoR cassette                                                             | loss of Mlh1                                          | stomach, small intestine, colon         | all mice developed adenomas and adenocarcinomas, viability 4-12 months; increased tumor incidence in <i>Apc</i> <sup>+/-1638N</sup> mice  | lymphomas, skin tumors and sarcomas                                                                                       | C57BL/6J                       | [223]      |
| <i>Mlh3</i>       | <i>Mlh3</i> <sup>-/-</sup>                            | exon 4 replaced by PGK HPRT cassette                                                         | loss of Mlh3                                          | stomach, small intestine, colon, rectum | 50% of mice developed adenomas and adenocarcinomas, viability 15-21 months                                                                | lymphomas, basal cell carcinoma of the skin, mammary gland carcinomas, osteosarcomas, testicular cancer, hepatic adenomas | 129 SV/EV                      | [227]      |
| <i>Mlh3; Pms2</i> | <i>Mlh3</i> <sup>-/-</sup> <i>Pms2</i> <sup>-/-</sup> | Mlh3: exon 4 replaced by PGK HPRT cassette<br>Pms2: exon 2 of Pms2 replaced by NeoR cassette | simultaneous loss of Mlh3 and Pms2                    | stomach, small intestine, colon, rectum | 84% of mice developed adenomas and adenocarcinomas, viability 6-12 months                                                                 | lymphomas, basal cell carcinoma of the skin, mammary gland carcinomas, osteosarcomas, testicular cancer, hepatic adenomas | 129 SV/EV                      | [227]      |
| <i>Msh2</i>       | <i>Msh2</i> <sup>-/-</sup>                            | NeoR cassette inserted in exon 11                                                            | loss of Msh2                                          | small intestine and colon               | 80% of mice developed adenomas and adenocarcinomas, viability 6-11 months; increased tumor incidence in <i>Apc</i> <sup>+/-Min</sup> mice | lymphomas                                                                                                                 | mixed C57BL/6J and 129/OLA     | [224, 230] |
| <i>Msh2</i>       | <i>Msh2</i> <sup>loxP/loxP</sup>                      | floxed exon 12; <i>Villin-Cre</i>                                                            | conditional loss of Msh2 in the intestinal epithelium | small intestine and colon               | 90% of mice developed adenomas and adenocarcinomas, viability 8-17 months                                                                 |                                                                                                                           | mixed C57BL/6J, 129/SV and SJL | [229]      |
| <i>Msh6</i>       | <i>Msh6</i> <sup>-/-</sup>                            | PuroR cassette inserted in exon 4                                                            | loss of Msh6                                          | not indicated                           | rare intestinal tumors (< 10% of mice), viability 6-12 months                                                                             | lymphomas, epithelial cancers of the uterus and skin                                                                      | mixed 129/OLA and FVB          | [225]      |
| <i>Msh3/6</i>     | <i>Msh3</i> <sup>-/-</sup> <i>Msh6</i> <sup>-/-</sup> | Msh3: HygR cassette inserted in exon 2<br>Msh6: PuroR cassette inserted in exon 4            | simultaneous loss of Msh3 and Msh6                    | not indicated                           | 60% of mice developed intestinal tumors, viability 6-10 months                                                                            | lymphomas, skin tumors                                                                                                    | mixed 129/OLA and FVB          | [225]      |
